# Supplementary material
Source: HighWire-hosted journal article supplement (https://bmjopenquality.bmj.com/content/7/2/e000111)
Supplement: inline-supplementary-material-1 [file inline-supplementary-material-1.pdf]

Audit Results and Findings

| Standard 1 – relating to VRIII                                                                                                                                                                                                                                                                                                                  |                                                                                                                                         |
|-------------------------------------------------------------------------------------------------------------------------------------------------------------------------------------------------------------------------------------------------------------------------------------------------------------------------------------------------|-----------------------------------------------------------------------------------------------------------------------------------------|
| <p>a) <u>Were patients prescribed the recommended fluids?</u></p> <p>100% of patients on VRIII are prescribed the recommended fluid substrate</p> <ul style="list-style-type: none"> <li>48% of patients received the recommended fluids (15 patients)</li> <li>52% of patients did not receive the recommended fluids (16 patients)</li> </ul> | <h3>Were patients prescribed the recommended fluids? (n=31)</h3> <p>Legend: ■ Recommended (15, 48%)<br/>■ Not Recommended (16, 52%)</p> |
| <b>Standard Not Met</b>                                                                                                                                                                                                                                                                                                                         | 48% of patients were prescribed the recommended fluids.                                                                                 |

Of the 16 patients receiving fluids not recommended:

| Breakdown of not recommended fluids in VRIII                                           |                    |               |
|----------------------------------------------------------------------------------------|--------------------|---------------|
|                                                                                        | Number of patients | % of patients |
| Sodium Chloride 0.9% 1 L                                                               | 2                  | 12.5          |
| Glucose 5% 1 L                                                                         | 5                  | 31.25         |
| *Conditional fluids                                                                    | 4                  | 25            |
| <b>No fluid prescribed</b>                                                             | 2                  | 12.5          |
| Other fluid                                                                            | 2                  | 12.5          |
| <b>Potassium containing fluid in patient with hyperkalaemia (K<sup>+</sup>&gt;5.0)</b> | 1                  | 6.25          |
| Total                                                                                  | 16                 | 100           |

- Conditional fluids is when a prescriber indicates a condition in the manner fluid should be administered (e.g. if BM>14, give sodium chloride 0.9% 1L over 10 hours, if BM<14, give glucose 5% 1L over 10 hours)
- Of the 16 patients, 3 patients received fluids in the category of *No Fluid* or *Potassium containing fluid in patient with hyperkalaemia* which could result in patient harm.
