# Supplementary material
Source: HighWire-hosted journal article supplement (https://bmjopenquality.bmj.com/content/7/2/e000111)

# Process Flow VRIII

---

## Fluid prescription with VRIII

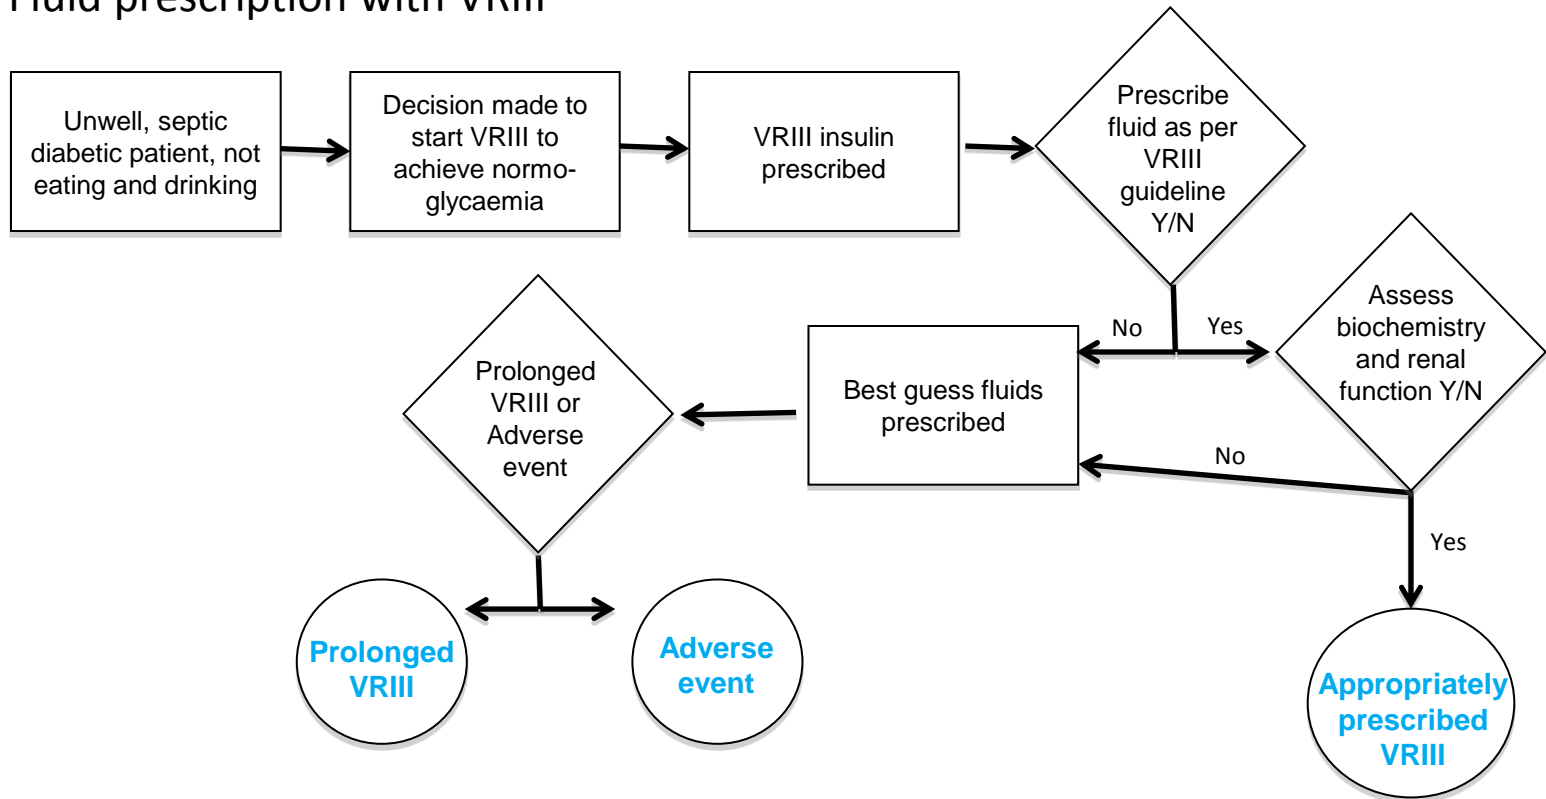

Supplement: inline-supplementary-material-3 [file inline-supplementary-material-3.pdf]
